# Supplementary material
Source: ML conference proceedings conference paper supplement (https://openreview.net/forum?id=pRpMAD3udW)
Supplement: supplementary_material [file attachment]

# Appendix

## A INDIVIDUAL TASK SUCCESS RATE OF DIFFERENT METHODS

In this section, we support all experimental results in Sec. 4 of our main paper with individual task success rates for all four levels of evaluation protocol. Specifically, the results for Table 1 and the ablation on Pretraining strategies can be found in Table 3, 4, 5 and 6. Figure 7 that ablates multimodal prompt encoding is based on the results from Table 7, 8, 9 and 10. The results in Figure 8 that ablate model and data sizes are based on the results from Table 11, 12, 13, 14, 15, 16, 17, and 18.

Additionally, we further conduct an ablation study on the transformer architecture of our policy by replacing the decoder-only architecture with encoder-decoder architecture (Our Method w/ Encoder-Decoder). Experimental results in Table 3, 4, 5 and 6 show that this variant does not perform as well as our method on the L1, L2, and L3 tasks, mainly due to its inability to tackle Task 09 (*Twist*) that requires deducting rotation angles from the prompt image sequence (Figure 2). However, it achieves a superior performance on the L4 Task 10 (*Follow Motion*). We hypothesize that it is due to the limit of model capacity. This policy learns a control policy that predicts its action dependent on the object bounding box, while lacking the capability to capture fine-grained visual information that contains the information of object rotation.

Table 3: L1 level generalization results. All methods share the same amount of parameters 92M. Integers in the first row refer to indices of tasks defined in the VIMA paper (Jiang et al., 2023).

| Method                  | T1   | T2   | T3   | T4   | T5   | T6   | T7  | T9   | T11  | T12  | T15  | T16  | T17  | Overall |
|-------------------------|------|------|------|------|------|------|-----|------|------|------|------|------|------|---------|
| VIMA                    | 100  | 100  | 100  | 100  | 65.0 | 99.5 | 100 | 13.5 | 96.0 | 94.5 | 100  | 88.0 | 77.0 | 87.2    |
| Gato OBJ                | 100  | 100  | 100  | 100  | 75.5 | 100  | 100 | 16.5 | 88.5 | 93.0 | 100  | 92.5 | 80.0 | 88.2    |
| Our Method w/o Pretrain | 100  | 100  | 100  | 98.5 | 88.0 | 100  | 100 | 20.5 | 100  | 94.0 | 99.0 | 93.0 | 98.0 | 91.6    |
| w/ Pretrain             | 98.5 | 100  | 100  | 99.5 | 94.0 | 100  | 100 | 100  | 100  | 94.0 | 95.5 | 94.0 | 96.5 | 97.8    |
| w/ Masked Pretrain      | 100  | 99.5 | 100  | 99.5 | 97.5 | 99.5 | 100 | 17.5 | 74.5 | 94.5 | 97.0 | 42.5 | 96.5 | 86.0    |
| w/ Encoder-Decoder      | 100  | 100  | 99.5 | 99.5 | 96.5 | 100  | 100 | 19.5 | 99.5 | 93.5 | 99.0 | 93.0 | 82.5 | 91.0    |

Table 4: L2 level generalization results. All methods share the same amount of parameters 92M. Integers in the first row refer to indices of tasks defined in the VIMA paper (Jiang et al., 2023).

| Method                  | T1   | T2  | T3   | T4   | T5   | T6   | T7   | T9   | T11  | T12  | T15  | T16  | T17  | Overall |
|-------------------------|------|-----|------|------|------|------|------|------|------|------|------|------|------|---------|
| VIMA                    | 100  | 100 | 100  | 99.5 | 61.0 | 100  | 100  | 12.5 | 97.5 | 95.0 | 100  | 87.5 | 77.5 | 87.0    |
| Gato OBJ                | 100  | 100 | 100  | 100  | 73.0 | 100  | 100  | 17.5 | 88.5 | 95.0 | 99.0 | 94.0 | 80.5 | 88.3    |
| Our Method w/o Pretrain | 100  | 100 | 100  | 99.0 | 87.0 | 100  | 100  | 23.5 | 100  | 94.0 | 99.5 | 92.0 | 98.0 | 91.8    |
| w/ Pretrain             | 98.5 | 100 | 100  | 99.0 | 96.5 | 99.5 | 100  | 100  | 100  | 95.5 | 95.0 | 93.0 | 96.0 | 97.9    |
| w/ Masked Pretrain      | 99.5 | 100 | 100  | 99.5 | 96.5 | 100  | 99.5 | 19.5 | 75.5 | 95.5 | 97.0 | 43.5 | 96.5 | 86.3    |
| w/ Encoder-Decoder      | 99.5 | 100 | 99.0 | 99.5 | 96.5 | 100  | 100  | 15.5 | 99.5 | 94.0 | 98.5 | 92.0 | 82.5 | 90.5    |

Table 5: L3 level generalization results. All methods share the same amount of parameters 92M. Integers in the first row refer to indices of tasks defined in the VIMA paper (Jiang et al., 2023).

| Method                  | T1   | T2   | T3  | T4   | T5   | T6   | T7   | T9   | T11  | T15  | T16  | T17  | Overall |
|-------------------------|------|------|-----|------|------|------|------|------|------|------|------|------|---------|
| VIMA                    | 99.5 | 100  | 100 | 99.5 | 63.0 | 99.5 | 100  | 12.0 | 98.5 | 99.5 | 58.5 | 78.0 | 84.0    |
| Gato OBJ                | 99.5 | 100  | 100 | 100  | 72.5 | 97.5 | 100  | 7.5  | 95.0 | 99.5 | 44.5 | 72.0 | 82.3    |
| Our Method w/o Pretrain | 99.5 | 100  | 100 | 100  | 90.0 | 100  | 100  | 20.5 | 100  | 99.5 | 50.5 | 99.5 | 88.3    |
| w/ Pretrain             | 98.0 | 99.0 | 100 | 99.5 | 94.0 | 97.5 | 99.0 | 97.0 | 96.5 | 95.0 | 47.0 | 98.0 | 93.4    |
| w/ Masked Pretrain      | 99.0 | 100  | 100 | 100  | 96.5 | 99.5 | 99.0 | 20.5 | 76.5 | 99.0 | 42.0 | 100  | 86.0    |
| w/ Encoder-Decoder      | 99.0 | 99.5 | 100 | 98.5 | 95.5 | 99.5 | 98.0 | 20.0 | 100  | 95.0 | 56.0 | 86.0 | 87.2    |

Table 6: L4 level generalization results. All methods share the same amount of parameters 92M. Integers in the first row refer to indices of tasks defined in the VIMA paper (Jiang et al., 2023).

| Method             | T8   | T10  | T13 | T14  | Overall |
|--------------------|------|------|-----|------|---------|
| VIMA               | 98.5 | 0.0  | 0.0 | 100  | 49.6    |
| Gato OBJ           | 99.5 | 0.0  | 0.0 | 98.0 | 49.4    |
| Our Method         |      |      |     |      |         |
| w/o Pretrain       | 97.0 | 0.0  | 0.0 | 99.5 | 49.1    |
| w/ Pretrain        | 97.5 | 41.0 | 1.0 | 97.0 | 59.1    |
| w/ Masked Pretrain | 95.0 | 0.0  | 0.0 | 99.0 | 48.5    |
| w/ Encoder-Decoder | 96.5 | 85.5 | 0.0 | 97.0 | 69.8    |

Table 7: Comparison of the performance of our method with different multimodal prompt encoder on L1 level generalization. All methods share the same amount of parameters 92M. Integers in the first row refer to indices of tasks defined in the VIMA paper (Jiang et al., 2023)

| Pretrain iter. | Method         | T1   | T2   | T3   | T4   | T5   | T6   | T7   | T9   | T11 | T12  | T15  | T16  | T17  | Overall |
|----------------|----------------|------|------|------|------|------|------|------|------|-----|------|------|------|------|---------|
| 0.0K           | T5 + RC (Ours) | 100  | 100  | 100  | 98.5 | 88.0 | 100  | 100  | 20.5 | 100 | 94.0 | 99.0 | 93.0 | 98.0 | 91.6    |
| 0.0K           | T5             | 100  | 99.5 | 98.5 | 99.0 | 84.5 | 100  | 100  | 16.0 | 100 | 94.5 | 98.0 | 49.5 | 97.0 | 87.4    |
| 0.0K           | VL-T5          | 100  | 100  | 98.5 | 99.5 | 66.0 | 100  | 100  | 18.0 | 100 | 93.0 | 96.5 | 94.0 | 96.0 | 89.3    |
| 3.1K           | T5 + RC (Ours) | 100  | 100  | 100  | 98.5 | 85.5 | 100  | 99.0 | 52.0 | 100 | 93.5 | 96.0 | 93.0 | 96.0 | 93.3    |
| 3.1K           | T5             | 100  | 100  | 100  | 100  | 98.5 | 100  | 100  | 18.5 | 100 | 93.5 | 97.0 | 43.5 | 96.5 | 88.3    |
| 3.1K           | VL-T5          | 100  | 99.5 | 100  | 100  | 70.0 | 99.5 | 100  | 23.5 | 100 | 94.5 | 99.5 | 43.5 | 96.5 | 86.7    |
| 5.2K           | T5 + RC (Ours) | 100  | 100  | 100  | 99.0 | 92.0 | 99.5 | 100  | 99.5 | 100 | 95.5 | 95.0 | 93.0 | 97.0 | 97.7    |
| 5.2K           | T5             | 100  | 100  | 100  | 98.5 | 98.0 | 100  | 100  | 19.5 | 100 | 94.0 | 98.5 | 42.0 | 96.5 | 88.2    |
| 5.2K           | VL-T5          | 100  | 99.5 | 100  | 99.0 | 94.0 | 99.5 | 99.5 | 21.0 | 100 | 94.0 | 95.5 | 43.0 | 96.5 | 87.8    |
| 10.3K          | T5 + RC (Ours) | 98.5 | 100  | 100  | 99.5 | 94.0 | 100  | 100  | 100  | 100 | 94.0 | 95.5 | 94.0 | 96.5 | 97.8    |
| 10.3K          | T5             | 99.5 | 99.5 | 100  | 97.0 | 98.0 | 99.0 | 99.5 | 22.0 | 100 | 94.0 | 99.5 | 41.0 | 97.0 | 88.2    |
| 10.3K          | VL-T5          | 99.5 | 99.0 | 100  | 100  | 97.5 | 99.0 | 100  | 100  | 100 | 93.5 | 98.0 | 43.0 | 97.0 | 94.3    |

Table 8: Comparison of the performance of our method with different multimodal prompt encoder on L2 level generalization. All methods share the same amount of parameters 92M. Integers in the first row refer to indices of tasks defined in the VIMA paper (Jiang et al., 2023)

| Pretrain iter. | Method         | T1   | T2   | T3   | T4   | T5   | T6   | T7   | T9   | T11 | T12  | T15  | T16  | T17  | Overall |
|----------------|----------------|------|------|------|------|------|------|------|------|-----|------|------|------|------|---------|
| 0.0K           | T5 + RC (Ours) | 100  | 100  | 100  | 99.0 | 87.0 | 100  | 100  | 23.5 | 100 | 94.0 | 99.5 | 92.0 | 98.0 | 91.8    |
| 0.0K           | T5             | 99.5 | 100  | 99.0 | 99.5 | 87.0 | 100  | 99.5 | 20.0 | 100 | 93.5 | 98.5 | 48.0 | 95.0 | 87.7    |
| 0.0K           | VL-T5          | 100  | 100  | 98.5 | 99.0 | 66.5 | 99.0 | 99.5 | 19.0 | 100 | 94.0 | 96.5 | 92.0 | 95.0 | 89.2    |
| 3.1K           | T5 + RC (Ours) | 99.5 | 100  | 100  | 98.5 | 89.5 | 100  | 99.5 | 52.0 | 100 | 94.0 | 92.5 | 92.0 | 96.0 | 93.3    |
| 3.1K           | T5             | 99.0 | 100  | 100  | 100  | 97.0 | 99.0 | 99.5 | 22.5 | 100 | 94.5 | 96.0 | 41.5 | 96.5 | 88.1    |
| 3.1K           | VL-T5          | 98.0 | 99.5 | 99.5 | 98.5 | 67.5 | 99.0 | 99.5 | 24.0 | 100 | 94.0 | 96.5 | 44.0 | 95.5 | 85.8    |
| 5.2K           | T5 + RC (Ours) | 100  | 100  | 100  | 97.5 | 91.0 | 98.5 | 99.5 | 99.5 | 100 | 95.5 | 93.0 | 92.5 | 96.5 | 97.2    |
| 5.2K           | T5             | 98.5 | 100  | 100  | 98.0 | 96.5 | 99.0 | 98.5 | 21.5 | 100 | 94.0 | 93.5 | 40.0 | 95.0 | 87.3    |
| 5.2K           | VL-T5          | 99.5 | 100  | 100  | 98.5 | 94.0 | 98.5 | 97.5 | 20.0 | 100 | 94.0 | 94.0 | 43.5 | 96.5 | 87.4    |
| 10.3K          | T5 + RC (Ours) | 98.5 | 100  | 100  | 99.0 | 96.5 | 99.5 | 100  | 100  | 100 | 95.5 | 95.0 | 93.0 | 96.0 | 97.9    |
| 10.3K          | T5             | 100  | 100  | 100  | 97.0 | 97.0 | 100  | 97.0 | 19.5 | 100 | 94.5 | 97.0 | 43.0 | 95.0 | 87.7    |
| 10.3K          | VL-T5          | 99.0 | 99.5 | 100  | 99.5 | 97.0 | 99.0 | 99.0 | 99.5 | 100 | 94.5 | 97.5 | 43.0 | 95.5 | 94.1    |

Table 9: Comparison of the performance of our method with different multimodal prompt encoder on L3 level generalization. All methods share the same amount of parameters 92M. Integers in the first row refer to indices of tasks defined in the VIMA paper (Jiang et al., 2023)

| Pretrain iter. | Method         | T1   | T2   | T3   | T4   | T5   | T6   | T7   | T9   | T11  | T15  | T16  | T17  | Overall |
|----------------|----------------|------|------|------|------|------|------|------|------|------|------|------|------|---------|
| 0.0K           | T5 + RC (Ours) | 99.5 | 100  | 100  | 100  | 90.0 | 100  | 100  | 20.5 | 100  | 99.5 | 50.5 | 99.5 | 88.3    |
| 0.0K           | T5             | 98.5 | 98.5 | 100  | 100  | 85.5 | 99.5 | 98.5 | 19.5 | 100  | 98.5 | 42.0 | 57.5 | 83.2    |
| 0.0K           | VL-T5          | 98.5 | 98.5 | 100  | 100  | 68.5 | 99.5 | 100  | 21.5 | 100  | 99.0 | 54.5 | 99.5 | 86.6    |
| 3.1K           | T5 + RC (Ours) | 97.0 | 98.0 | 99.0 | 99.0 | 90.5 | 96.0 | 99.5 | 45.5 | 98.0 | 97.0 | 47.5 | 96.5 | 88.6    |
| 3.1K           | T5             | 96.0 | 99.0 | 99.5 | 100  | 98.0 | 97.0 | 96.0 | 21.5 | 100  | 95.5 | 42.0 | 99.5 | 87.0    |
| 3.1K           | VL-T5          | 96.5 | 97.0 | 99.5 | 99.5 | 69.0 | 94.5 | 95.0 | 21.0 | 99.5 | 96.5 | 42.0 | 100  | 84.2    |
| 5.2K           | T5 + RC (Ours) | 99.5 | 99.0 | 100  | 99.0 | 93.0 | 98.0 | 99.0 | 98.0 | 98.0 | 95.5 | 46.0 | 97.0 | 93.5    |
| 5.2K           | T5             | 96.5 | 96.0 | 99.5 | 100  | 97.5 | 98.5 | 97.0 | 17.5 | 100  | 97.0 | 38.5 | 100  | 86.5    |
| 5.2K           | VL-T5          | 96.0 | 98.5 | 99.5 | 100  | 96.5 | 95.5 | 95.5 | 21.0 | 100  | 98.0 | 41.5 | 100  | 86.8    |
| 10.3K          | T5 + RC (Ours) | 98.0 | 99.0 | 100  | 99.5 | 94.0 | 97.5 | 99.0 | 97.0 | 96.5 | 95.0 | 47.0 | 98.0 | 93.4    |
| 10.3K          | T5             | 99.0 | 97.5 | 100  | 99.5 | 96.5 | 96.0 | 95.0 | 15.5 | 100  | 95.5 | 43.5 | 99.5 | 86.5    |
| 10.3K          | VL-T5          | 98.0 | 97.0 | 100  | 99.5 | 96.0 | 97.0 | 96.5 | 84.5 | 100  | 99.5 | 41.0 | 99.5 | 92.4    |

Table 10: Comparison of the performance of our method with different multimodal prompt encoder on L4 level generalization. All methods share the same amount of parameters 92M. Integers in the first row refer to indices of tasks defined in the VIMA paper (Jiang et al., 2023)

| Pretrain iter. | Method         | T8   | T10  | T13 | T14  | Overall |
|----------------|----------------|------|------|-----|------|---------|
| 0.0K           | T5 + RC (Ours) | 97.0 | 0.0  | 0.0 | 99.5 | 49.1    |
| 0.0K           | T5             | 95.0 | 0.0  | 0.0 | 98.5 | 48.4    |
| 0.0K           | VL-T5          | 99.0 | 0.0  | 0.0 | 97.5 | 49.1    |
| 3.1K           | T5 + RC (Ours) | 97.5 | 12.5 | 0.0 | 98.5 | 52.1    |
| 3.1K           | T5             | 98.0 | 45.0 | 0.0 | 95.5 | 59.6    |
| 3.1K           | VL-T5          | 98.5 | 64.0 | 0.0 | 96.0 | 64.6    |
| 5.2K           | T5 + RC (Ours) | 98.0 | 40.5 | 0.0 | 96.5 | 58.8    |
| 5.2K           | T5             | 98.5 | 55.5 | 0.0 | 96.0 | 62.5    |
| 5.2K           | VL-T5          | 98.0 | 37.5 | 0.0 | 96.5 | 58.0    |
| 10.3K          | T5 + RC (Ours) | 97.5 | 41.0 | 1.0 | 97.0 | 59.1    |
| 10.3K          | T5             | 98.5 | 39.5 | 0.0 | 98.5 | 59.1    |
| 10.3K          | VL-T5          | 97.5 | 53.5 | 0.0 | 98.0 | 62.3    |

Table 11: Comparison of the performance of our method with different model sizes ranging from 2M to 92M on L1 level generalization results. Integers in the first row refer to indices of tasks defined in the VIMA paper (Jiang et al., 2023)

| Model size. | Method            | T1   | T2   | T3   | T4   | T5   | T6   | T7   | T9   | T11  | T12  | T15  | T16  | T17  | Overall |
|-------------|-------------------|------|------|------|------|------|------|------|------|------|------|------|------|------|---------|
| 2M          | Ours w/o Pretrain | 100  | 98.5 | 99.0 | 89.5 | 48.5 | 100  | 100  | 19.5 | 97.0 | 91.0 | 98.0 | 36.0 | 24.0 | 77.0    |
| 2M          | Ours              | 99.5 | 99.0 | 97.5 | 99.0 | 67.5 | 100  | 99.5 | 18.5 | 91.5 | 93.0 | 99.0 | 38.0 | 64.5 | 82.0    |
| 4M          | Ours w/o Pretrain | 100  | 100  | 99.5 | 97.0 | 55.0 | 100  | 100  | 18.0 | 96.0 | 95.0 | 99.5 | 44.0 | 40.0 | 80.3    |
| 4M          | Ours              | 100  | 100  | 86.5 | 99.0 | 63.5 | 99.5 | 100  | 20.5 | 92.0 | 95.5 | 98.0 | 83.5 | 57.0 | 84.2    |
| 9M          | Ours w/o Pretrain | 100  | 100  | 96.0 | 99.0 | 57.0 | 100  | 100  | 23.0 | 98.0 | 94.0 | 98.5 | 47.0 | 94.0 | 85.1    |
| 9M          | Ours              | 100  | 100  | 99.0 | 99.0 | 87.0 | 100  | 100  | 19.0 | 100  | 95.5 | 98.5 | 92.5 | 97.0 | 91.3    |
| 20M         | Ours w/o Pretrain | 100  | 100  | 100  | 98.5 | 67.5 | 100  | 100  | 30.5 | 98.5 | 95.0 | 99.0 | 49.5 | 85.0 | 86.4    |
| 20M         | Ours              | 100  | 100  | 100  | 97.0 | 90.0 | 100  | 99.5 | 19.0 | 100  | 94.0 | 99.5 | 93.5 | 97.5 | 91.5    |
| 43M         | Ours w/o Pretrain | 100  | 100  | 100  | 98.5 | 67.0 | 100  | 100  | 17.0 | 100  | 94.0 | 99.0 | 92.5 | 96.5 | 89.6    |
| 43M         | Ours              | 99.5 | 100  | 99.5 | 95.5 | 89.0 | 97.5 | 100  | 100  | 100  | 94.5 | 96.0 | 94.5 | 96.5 | 97.1    |
| 92M         | Ours w/o Pretrain | 100  | 100  | 100  | 98.5 | 88.0 | 100  | 100  | 20.5 | 100  | 94.0 | 99.0 | 93.0 | 98.0 | 91.6    |
| 92M         | Ours              | 98.5 | 100  | 100  | 99.5 | 94.0 | 100  | 100  | 100  | 100  | 94.0 | 95.5 | 94.0 | 96.5 | 97.8    |

Table 12: Comparison of the performance of our method with different model sizes ranging from 2M to 92M on L2 level generalization results. Integers in the first row refer to indices of tasks defined in the VIMA paper (Jiang et al., 2023)

| Model size. | Method            | T1   | T2   | T3   | T4   | T5   | T6   | T7   | T9   | T11  | T12  | T15  | T16  | T17  | Overall |
|-------------|-------------------|------|------|------|------|------|------|------|------|------|------|------|------|------|---------|
| 2M          | Ours w/o Pretrain | 95.5 | 84.5 | 99.0 | 87.0 | 50.0 | 96.5 | 91.0 | 21.0 | 97.0 | 91.0 | 88.0 | 33.5 | 11.5 | 72.7    |
|             | Ours              | 99.5 | 98.5 | 98.5 | 98.5 | 59.0 | 100  | 98.5 | 20.5 | 92.0 | 92.5 | 99.0 | 39.5 | 61.5 | 81.3    |
| 4M          | Ours w/o Pretrain | 99.0 | 98.5 | 100  | 97.0 | 55.0 | 99.5 | 98.5 | 21.0 | 96.5 | 95.5 | 97.0 | 44.0 | 35.0 | 79.7    |
|             | Ours              | 100  | 100  | 87.0 | 99.0 | 67.5 | 99.5 | 99.5 | 19.0 | 92.5 | 95.5 | 97.0 | 84.0 | 60.0 | 84.7    |
| 9M          | Ours w/o Pretrain | 100  | 100  | 96.5 | 98.5 | 58.0 | 99.5 | 99.0 | 25.5 | 97.5 | 94.5 | 94.5 | 47.0 | 88.0 | 84.5    |
|             | Ours              | 100  | 100  | 99.5 | 98.5 | 86.5 | 99.5 | 100  | 19.0 | 100  | 94.5 | 97.0 | 91.5 | 95.0 | 90.8    |
| 20M         | Ours w/o Pretrain | 100  | 100  | 100  | 98.5 | 72.0 | 100  | 100  | 29.5 | 98.0 | 95.5 | 99.0 | 46.0 | 83.5 | 86.3    |
|             | Ours              | 100  | 100  | 100  | 97.0 | 86.5 | 99.0 | 99.0 | 19.5 | 100  | 95.0 | 97.0 | 91.5 | 96.5 | 90.8    |
| 43M         | Ours w/o Pretrain | 100  | 100  | 100  | 98.5 | 72.5 | 100  | 100  | 18.5 | 100  | 93.5 | 99.5 | 92.0 | 96.0 | 90.0    |
|             | Ours              | 99.0 | 100  | 100  | 97.0 | 90.5 | 98.0 | 100  | 99.5 | 100  | 95.5 | 94.0 | 93.0 | 96.5 | 97.2    |
| 92M         | Ours w/o Pretrain | 100  | 100  | 100  | 99.0 | 87.0 | 100  | 100  | 23.5 | 100  | 94.0 | 99.5 | 92.0 | 98.0 | 91.8    |
|             | Ours              | 98.5 | 100  | 100  | 99.0 | 96.5 | 99.5 | 100  | 100  | 100  | 95.5 | 95.0 | 93.0 | 96.0 | 97.9    |

Table 13: Comparison of the performance of our method with different model sizes ranging from 2M to 92M on L3 level generalization results. Integers in the first row refer to indices of tasks defined in the VIMA paper (Jiang et al., 2023)

| Model size. | Method            | T1   | T2   | T3   | T4   | T5   | T6   | T7   | T9   | T11  | T15  | T16  | T17  | Overall |
|-------------|-------------------|------|------|------|------|------|------|------|------|------|------|------|------|---------|
| 2M          | Ours w/o Pretrain | 97.0 | 91.0 | 100  | 92.5 | 46.0 | 96.5 | 95.5 | 15.5 | 95.5 | 95.0 | 36.0 | 8.0  | 72.4    |
|             | Ours              | 99.0 | 98.5 | 99.5 | 99.5 | 67.0 | 99.5 | 99.5 | 16.5 | 83.5 | 98.5 | 33.5 | 54.0 | 79.0    |
| 4M          | Ours w/o Pretrain | 98.5 | 98.0 | 100  | 94.5 | 53.5 | 95.0 | 99.0 | 17.0 | 99.0 | 87.5 | 47.0 | 5.5  | 74.5    |
|             | Ours              | 95.5 | 99.0 | 75.5 | 95.5 | 61.0 | 95.5 | 96.5 | 19.0 | 92.5 | 79.5 | 42.0 | 32.0 | 73.6    |
| 9M          | Ours w/o Pretrain | 93.5 | 97.5 | 96.0 | 100  | 64.0 | 95.0 | 96.0 | 17.5 | 97.5 | 85.0 | 43.0 | 44.0 | 77.4    |
|             | Ours              | 97.0 | 97.0 | 100  | 96.5 | 86.0 | 99.0 | 99.0 | 23.5 | 98.5 | 96.0 | 52.5 | 100  | 87.1    |
| 20M         | Ours w/o Pretrain | 99.5 | 100  | 100  | 100  | 71.5 | 100  | 100  | 26.0 | 98.5 | 98.5 | 43.5 | 87.5 | 85.4    |
|             | Ours              | 97.0 | 97.0 | 99.5 | 99.5 | 89.0 | 98.0 | 98.0 | 24.0 | 100  | 99.0 | 53.5 | 98.0 | 87.7    |
| 43M         | Ours w/o Pretrain | 99.5 | 100  | 100  | 100  | 74.0 | 100  | 99.5 | 25.0 | 100  | 99.5 | 54.0 | 99.0 | 87.5    |
|             | Ours              | 95.0 | 98.0 | 99.5 | 96.5 | 86.0 | 95.5 | 96.5 | 97.0 | 99.5 | 96.0 | 40.0 | 99.0 | 91.5    |
| 92M         | Ours w/o Pretrain | 99.5 | 100  | 100  | 100  | 90.0 | 100  | 100  | 20.5 | 100  | 99.5 | 50.5 | 99.5 | 88.3    |
|             | Ours              | 98.0 | 99.0 | 100  | 99.5 | 94.0 | 97.5 | 99.0 | 97.0 | 96.5 | 95.0 | 47.0 | 98.0 | 93.4    |

Table 14: Comparison of the performance of our method with different model sizes ranging from 2M to 92M on L4 level generalization results. Integers in the first row refer to indices of tasks defined in the VIMA paper (Jiang et al., 2023)

| Model size. | Method            | T8   | T10  | T13 | T14  | Overall |
|-------------|-------------------|------|------|-----|------|---------|
| 2M          | Ours w/o Pretrain | 78.5 | 0.0  | 0.0 | 95.5 | 43.5    |
|             | Ours              | 47.5 | 35.5 | 0.5 | 97.5 | 45.2    |
| 4M          | Ours w/o Pretrain | 99.5 | 0.0  | 0.0 | 95.5 | 48.8    |
|             | Ours              | 96.0 | 0.5  | 0.0 | 92.5 | 47.2    |
| 9M          | Ours w/o Pretrain | 96.5 | 1.0  | 0.0 | 95.0 | 48.1    |
|             | Ours              | 99.5 | 15.5 | 0.5 | 98.0 | 53.4    |
| 20M         | Ours w/o Pretrain | 99.0 | 0.0  | 0.0 | 99.0 | 49.5    |
|             | Ours              | 97.0 | 22.0 | 0.0 | 95.5 | 53.6    |
| 43M         | Ours w/o Pretrain | 99.0 | 0.0  | 0.0 | 98.5 | 49.4    |
|             | Ours              | 95.5 | 6.0  | 0.0 | 96.0 | 49.4    |
| 92M         | Ours w/o Pretrain | 97.0 | 0.0  | 0.0 | 99.5 | 49.1    |
|             | Ours              | 97.5 | 41.0 | 1.0 | 97.0 | 59.1    |

Table 15: Comparison of the performance of our method with different scales of training data on L1 level generalization results. Integers in the first row refer to indices of tasks defined in the VIMA paper (Jiang et al., 2023)

| Data Size | Method            | T1   | T2   | T3   | T4   | T5   | T6   | T7   | T9   | T11  | T12  | T15  | T16  | T17  | Overall |
|-----------|-------------------|------|------|------|------|------|------|------|------|------|------|------|------|------|---------|
| 10%       | Ours w/o Pretrain | 100  | 98.5 | 96.5 | 97.0 | 74.0 | 97.5 | 100  | 19.0 | 100  | 93.0 | 93.0 | 88.0 | 93.0 | 88.4    |
| 10%       | Ours              | 100  | 99.5 | 96.5 | 89.0 | 65.5 | 98.0 | 98.5 | 73.5 | 97.5 | 93.5 | 92.0 | 89.0 | 93.0 | 91.2    |
| 50%       | Ours w/o Pretrain | 100  | 99.5 | 97.5 | 98.0 | 74.0 | 99.5 | 99.5 | 20.0 | 100  | 92.5 | 98.0 | 82.0 | 91.0 | 88.6    |
| 50%       | Ours              | 100  | 99.5 | 98.5 | 98.0 | 86.5 | 99.5 | 99.5 | 98.5 | 100  | 93.5 | 96.5 | 95.5 | 96.5 | 97.1    |
| 100%      | Ours w/o Pretrain | 100  | 100  | 100  | 98.5 | 88.0 | 100  | 100  | 20.5 | 100  | 94.0 | 99.0 | 93.0 | 98.0 | 91.6    |
| 100%      | Ours              | 98.5 | 100  | 100  | 99.5 | 94.0 | 100  | 100  | 100  | 100  | 94.0 | 95.5 | 94.0 | 96.5 | 97.8    |

Table 16: Comparison of the performance of our method with different scales of training data on L2 level generalization results. Integers in the first row refer to indices of tasks defined in the VIMA paper (Jiang et al., 2023)

| Data Size | Method            | T1   | T2   | T3   | T4   | T5   | T6   | T7   | T9   | T11  | T12  | T15  | T16  | T17  | Overall |
|-----------|-------------------|------|------|------|------|------|------|------|------|------|------|------|------|------|---------|
| 10%       | Ours w/o Pretrain | 99.5 | 99.0 | 97.0 | 95.5 | 72.5 | 97.5 | 99.5 | 20.5 | 98.5 | 93.0 | 91.5 | 88.5 | 91.0 | 88.0    |
| 10%       | Ours              | 99.0 | 99.5 | 94.5 | 90.0 | 62.5 | 98.5 | 99.0 | 77.5 | 98.5 | 94.0 | 90.0 | 87.0 | 89.0 | 90.7    |
| 50%       | Ours w/o Pretrain | 98.5 | 100  | 97.0 | 98.0 | 72.0 | 99.5 | 99.5 | 16.5 | 100  | 91.5 | 97.5 | 84.5 | 88.5 | 87.9    |
| 50%       | Ours              | 100  | 100  | 99.0 | 97.5 | 88.5 | 99.0 | 99.0 | 98.5 | 100  | 95.0 | 96.0 | 95.5 | 96.5 | 97.3    |
| 100%      | Ours w/o Pretrain | 100  | 100  | 100  | 99.0 | 87.0 | 100  | 100  | 23.5 | 100  | 94.0 | 99.5 | 92.0 | 98.0 | 91.8    |
| 100%      | Ours              | 98.5 | 100  | 100  | 99.0 | 96.5 | 99.5 | 100  | 100  | 100  | 95.5 | 95.0 | 93.0 | 96.0 | 97.9    |

Table 17: Comparison of the performance of our method with different scales of training data on L3 level generalization results. Integers in the first row refer to indices of tasks defined in the VIMA paper (Jiang et al., 2023)

| Data Size | Method            | T1   | T2   | T3   | T4   | T5   | T6   | T7   | T9   | T11  | T15  | T16  | T17  | Overall |
|-----------|-------------------|------|------|------|------|------|------|------|------|------|------|------|------|---------|
| 10%       | Ours w/o Pretrain | 98.0 | 97.0 | 97.5 | 98.5 | 74.5 | 97.5 | 99.0 | 18.0 | 100  | 96.5 | 53.5 | 99.0 | 85.8    |
| 10%       | Ours              | 90.0 | 93.5 | 98.5 | 93.0 | 71.0 | 90.0 | 90.5 | 56.0 | 90.0 | 83.0 | 52.0 | 20.5 | 77.3    |
| 50%       | Ours w/o Pretrain | 97.5 | 99.5 | 99.0 | 99.5 | 70.5 | 98.5 | 99.0 | 19.0 | 100  | 97.0 | 57.5 | 93.5 | 85.9    |
| 50%       | Ours              | 97.0 | 97.5 | 99.0 | 99.5 | 86.0 | 97.5 | 96.5 | 95.5 | 98.0 | 97.0 | 47.5 | 100  | 92.6    |
| 100%      | Ours w/o Pretrain | 99.5 | 100  | 100  | 100  | 90.0 | 100  | 100  | 20.5 | 100  | 99.5 | 50.5 | 99.5 | 88.3    |
| 100%      | Ours              | 98.0 | 99.0 | 100  | 99.5 | 94.0 | 97.5 | 99.0 | 97.0 | 96.5 | 95.0 | 47.0 | 98.0 | 93.4    |

Table 18: Comparison of the performance of our method with different scales of training data on L4 level generalization results. Integers in the first row refer to indices of tasks defined in the VIMA paper (Jiang et al., 2023)

| Data Size | Method            | T8   | T10  | T13 | T14  | Overall |
|-----------|-------------------|------|------|-----|------|---------|
| 10%       | Ours w/o Pretrain | 92.0 | 0.0  | 0.0 | 94.5 | 46.6    |
| 10%       | Ours              | 91.0 | 39.0 | 0.0 | 88.0 | 54.5    |
| 50%       | Ours w/o Pretrain | 91.5 | 0.0  | 0.0 | 97.0 | 47.1    |
| 50%       | Ours              | 95.0 | 12.5 | 0.0 | 96.0 | 50.9    |
| 100%      | Ours w/o Pretrain | 97.0 | 0.0  | 0.0 | 99.5 | 49.1    |
| 100%      | Ours              | 97.5 | 41.0 | 1.0 | 97.0 | 59.1    |

## B PSEUDO-CODES & TRAINING DETAILS

---

### Algorithm 1 Robot Control with multimodal prompts through pretraining and multitask FT

---

**Input:** Dataset  $\mathcal{D} = \{\zeta_1, \zeta_2, \dots\}$ , policy parameter  $\theta$ , number of pretraining iterations  $N_{\text{pretrain}}$ , number of multi-task imitation finetuning iterations  $N_{\text{FT}}$

- 1: **for**  $i = 1, \dots, N_{\text{pretrain}}$  **do**
  - 2:   Sample a mini-batch  $\mathcal{B}$  from  $\mathcal{D}$
  - 3:   Minimize  $L_{\text{pretrain}}(\theta)$  defined in Eq. 3 on  $\mathcal{B}$
  - 4: **end for**
  - 5: **for**  $i = 1, \dots, N_{\text{FT}}$  **do**
  - 6:   Sample a mini-batch  $\mathcal{B}$  from  $\mathcal{D}$
  - 7:   Minimize  $L_{\text{imitation}}(\theta)$  defined in Eq. 4 on  $\mathcal{B}$
  - 8: **end for**
- 

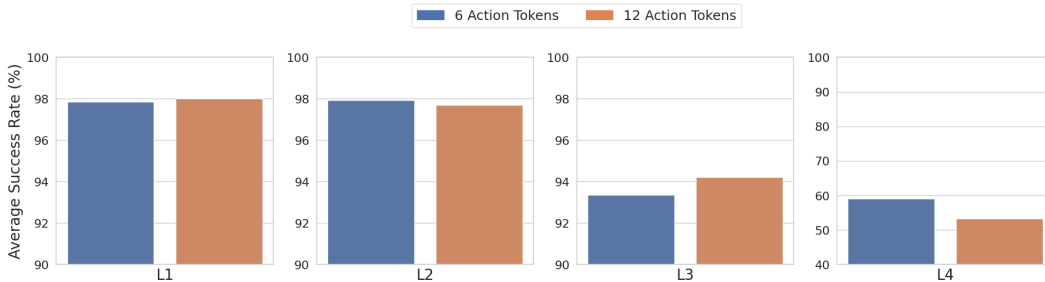

Figure 9: Ablation on the number of action tokens.

Algorithm 1 presents the pseudo-codes for the training pipeline, which includes a pretraining phase and a multi-task FT phase. We set our training HP following the recipe provided by VIMA, which open-sourced its policy architectures without providing the training codes. We conduct our experiments on cluster nodes, each with 8 NVIDIA-A10G. Table 19 presents the HP for our training pipeline. As we build our policy based on the VIMA Policy, we refer interested readers to Tables 2 and 3 in Appendix C of VIMA paper (Jiang et al., 2023) for all model parameters.

Additionally, the action space  $\mathcal{A}$  includes initial pose  $\mathcal{T}_{\text{initial}} \in \mathcal{R}^6$  and  $\mathcal{T}_{\text{target}} \in \mathcal{R}^6$ . Each pose is a 6-dimension vector with 2 for xy position and 4 for rotation represented in quaternion. Since the VIMA-BENCH focuses on tabletop manipulation, the rotation quaternion of  $\mathcal{T}_{\text{initial}}$  is always a constant vector. So is the first two dimensions of the rotation quaternion of  $\mathcal{T}_{\text{initial}}$ . Therefore, we only tokenize the other 6 action dimensions to improve computational efficiency. Thus, each action worth 6 tokens. Moreover, we conduct an ablation study to show that this choice will not affect the task success rate. As shown in Figure 9, modeling each of the 12 action dimensions as a single token achieves almost the same performance as modeling the 6 active action dimensions.

Table 19: Hyper-parameters for our training pipeline

| Phase    | Hyperparameter                            | Value                                               |
|----------|-------------------------------------------|-----------------------------------------------------|
| Shared   | Learning Rate (LR)                        | 1e-4                                                |
|          | Minimum LR                                | 1e-7                                                |
|          | Warmup Steps                              | 7K                                                  |
|          | Weight Decay                              | 0                                                   |
|          | Dropout                                   | 0.1                                                 |
|          | Gradient Clip Threshold                   | 1.0                                                 |
|          | Optimizer                                 | AdamW (Loshchilov & Hutter, 2017)                   |
|          | Batch Size                                | 128                                                 |
|          | Iterations per epochs                     | 5158                                                |
| Pretrain | Training epochs                           | 20                                                  |
|          | Training iterations $N_{\text{pretrain}}$ | $20 \times \text{Iterations per epochs} = 103160$   |
|          | LR Cosine Annealing Steps                 | $N_{\text{pretrain}} - \text{Warmup Steps} = 96160$ |
| Finetune | LR Cosine Annealing Steps                 | 17K                                                 |
|          | Training epochs                           | 10                                                  |
|          | Training iterations $N_{\text{FT}}$       | $10 \times \text{Iterations per epochs} = 51580$    |

## C DETAILS OF EVALUATING THE IN-CONTEXT LEARNING ABILITY

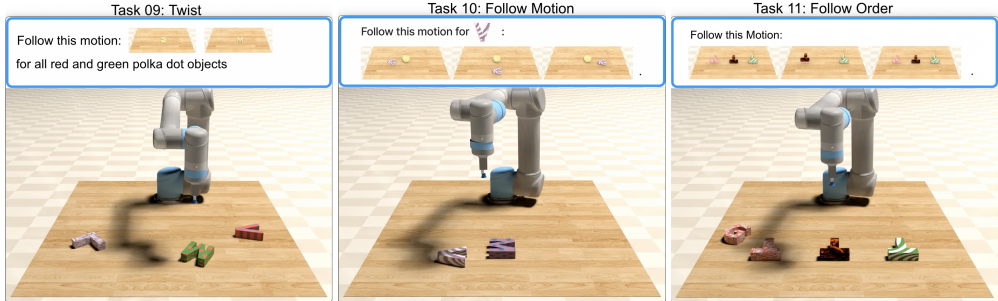

Figure 10: The new set of L4 tasks with in-context examples and modified prompts.

We provide training details for the experiments conducted in Sec. 4.3 by introducing the data augmentation strategies, pretraining, our *Modified FT*, and how we edit the task prompt for Task 09 (*Twist*) and Task 10 (*Follow Order*). Moreover, the L1, L2 and L3 success rate in this settings are given by 97.6%, 97.7%, and 93.0%, respectively.

**Data Augmentation** To improve the generalizability of the pretrained model, we randomly apply the standard random data augmentation techniques, including Color Jitter and Gray Scale (He et al., 2020) to the prompt images. Since we adopt an object-centric representation, we randomly shift the bounding box location for all objects in the whole trajectory with the same constant value. Note that we only augment the prompt images without modifying the observation images.

**Pretraining** We empirically find that further dividing the pretraining phase into two steps can improve the performance. We first pretrain a policy for 20 epochs and only extract the object encoder from it. Next, we use the pretrained object encoder to initialize another policy and pretrain it for 5 epochs. And the FT phase remains unchanged.

**Modified FT** To improve the model’s ability to understand both visual and textual object descriptions, we randomly replace the object images in the multimodal prompts with text descriptions during multi-task FT. For example, the task prompt for *Follow Motion* in Figure 10 can be rephrased as

Follow this motion for the white and purple striped V:  $\{\text{frame}_1\}, \{\text{frame}_2\}, \{\text{frame}_2\}$ .

Note that only object images will be converted into text descriptions. Images depicted the scene, e.g.,  $\text{frame}_1, \text{frame}_2, \text{frame}_3$ , will never be converted to text. We randomly apply this operation to the task prompt of the pretraining tasks during the FT phase.

**Edit Prompts** As shown in Figure 10, we modify the task prompt for both *Twist* and *Follow order* to make them similar to the pretraining prompts. Specifically, the task prompt for *Twist* is modified as below

**Original:** “Twist” is defined as rotating object a specific angle. For examples: From  $\{\text{before\_twist}_1\}$  to  $\{\text{after\_twist}_1\}$ . From  $\{\text{before\_twist}_2\}$  to  $\{\text{after\_twist}_2\}$ . From  $\{\text{before\_twist}_3\}$  to  $\{\text{after\_twist}_3\}$ . Now twist all [TEXT OBJ DESCRIPTION] objects.

**Modified:** Follow this motion:  $\{\text{before\_twist}_1\}$  to  $\{\text{after\_twist}_1\}$  for all [TEXT OBJ DESCRIPTION] objects.

Similarly, the task prompt for *Follow Order* is modified as below:

**Original:** Stack objects in this order  $\{\text{frame}_1\}, \{\text{frame}_2\}, \{\text{frame}_2\}$ .

**Modified:** Follow this motion:  $\{\text{frame}_1\}, \{\text{frame}_2\}, \{\text{frame}_2\}$ .
